# Supplementary material for: Highly reversible Li-ion full batteries using a Mg-doped Li-rich Li1.2Ni0.28Mn0.468Mg0.052O2 cathode and carbon-decorated Mn3O4 anode with hierarchical microsphere structures
Source: Royal Society of Chemistry journal article supplement (doi:10.1039/d2nj03401h), 2022-01-01
Supplement: d2nj03401h1.pdf [file d2nj03401h1.pdf]

## Supporting Information

### Highly reversible Li-ion full batteries using Mg-doped Li-rich $\text{Li}_{1.2}\text{Ni}_{0.28}\text{Mn}_{0.468}\text{Mg}_{0.052}\text{O}_2$ cathode and carbon-decorated $\text{Mn}_3\text{O}_4$ anode with hierarchical microsphere structures

By Jong Guk Kim,<sup>a†</sup> Yuseong Noh,<sup>b††</sup> and Youngmin Kim<sup>\*c</sup>

<sup>a</sup>Research Center for Materials Analysis, Korea Basic Science Institute (KBSI), 169-148  
Gwahak-ro, Yuseong-gu, Daejeon 34133, Republic of Korea

<sup>b</sup>Department of Chemical Engineering, Pohang University of Science and Technology  
(POSTECH), 77 Cheongam-Ro, Nam-gu, Pohang, Gyeongbuk 37673, Republic of Korea

<sup>c</sup>Chemical & Process Technology Division, Korea Research Institute of Chemical Technology  
(KRICT), 141 Gajeong-ro, Yuseong-gu, Daejeon 34114, Republic of Korea

†Present Addresses: Dongwon Systems, 68, Mabang-ro, Seocho-gu, Seoul, Republic of Korea

††Present Addresses: Samsung Electronics, Samsungjeonja-ro, Hwaseong-si, Gyeonggi-do  
18448, Republic of Korea

\* Corresponding Author: Tel: +82-42-610-8576,

E-mail: ykim@kriect.re.kr

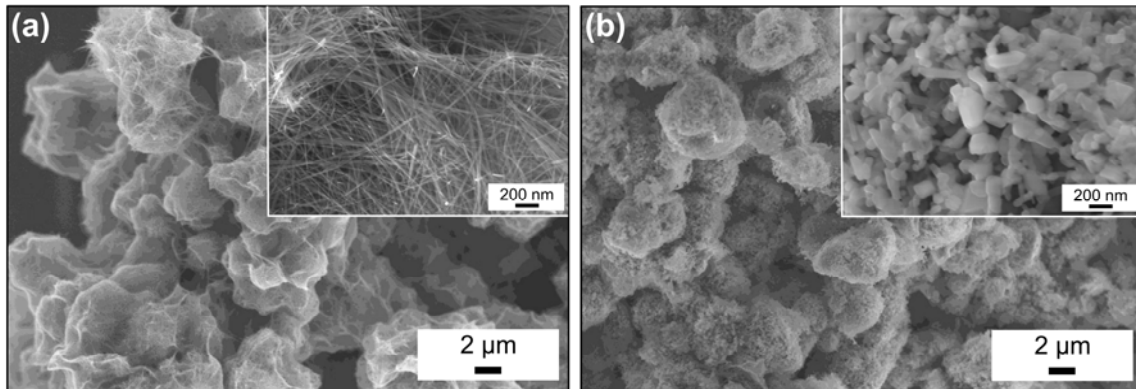

**Fig. S1** (a and b) Typical SEM images of the (a) MnO<sub>2</sub> and (b) LLNMO MSs.

**Table S1** Crystallographic data of the LLNMO@Mg and LLNMO MSs.

| Samples      | Lattice parameters |              |                            | <i>I</i> (003)/ <i>I</i> (104) |
|--------------|--------------------|--------------|----------------------------|--------------------------------|
|              | <i>a</i> (Å)       | <i>c</i> (Å) | <i>V</i> (Å <sup>3</sup> ) |                                |
| LLNMO@Mg MSs | 2.8580             | 14.2560      | 100.8446                   | 1.39                           |
| LLNMO MSs    | 2.8560             | 14.2460      | 100.6329                   | 1.25                           |

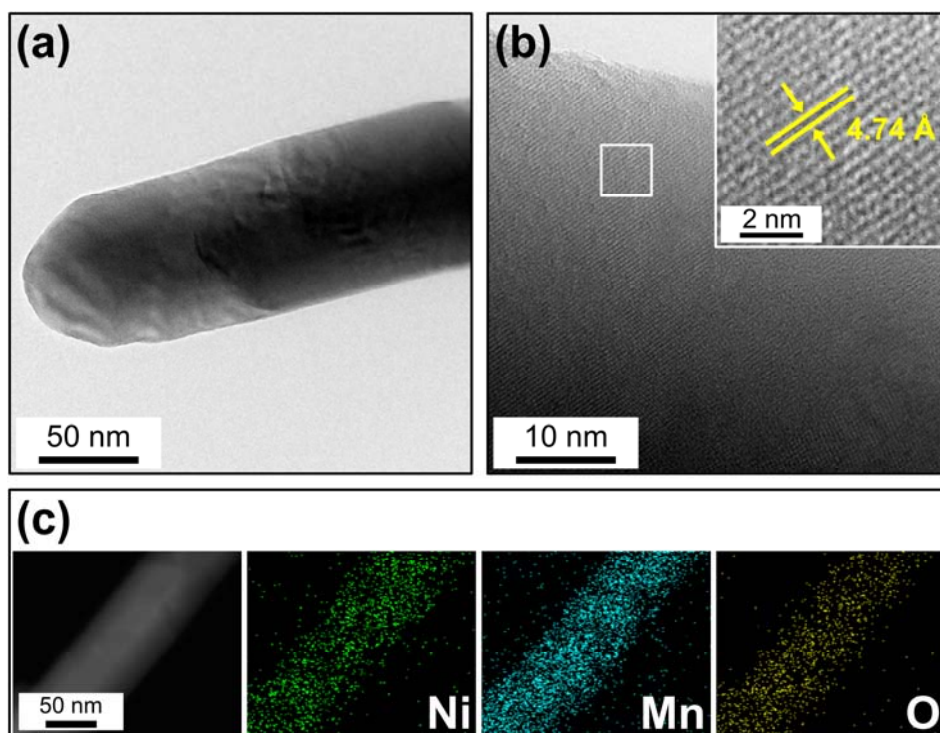

**Fig. S2** (a) TEM and (b) HRTEM image of the LLNMO MSs. (c) Dark-field TEM image of LLNMO MSs and corresponding elemental mapping images of Ni, Mn, and O.

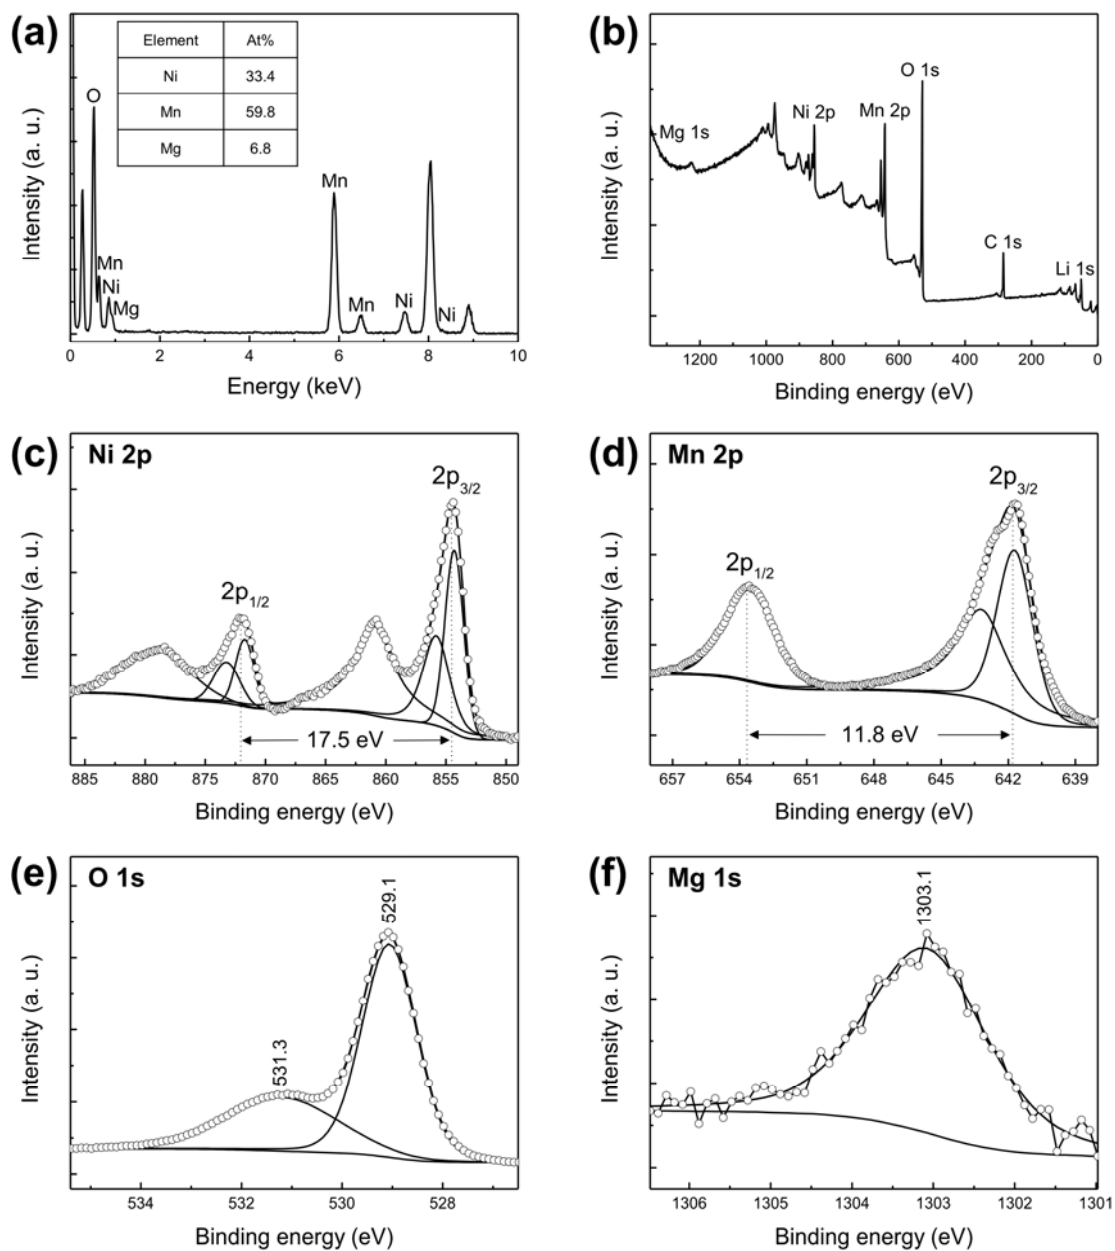

**Fig. S3** (a) EDX spectrum of the LLNMO@Mg MSs. (b-f) XPS spectra of (b) full scan, (c) Ni 2p, (d) Mn 2p, (e) O 1s, (f) Mg 1s regions of the LLNMO@Mg MSs.

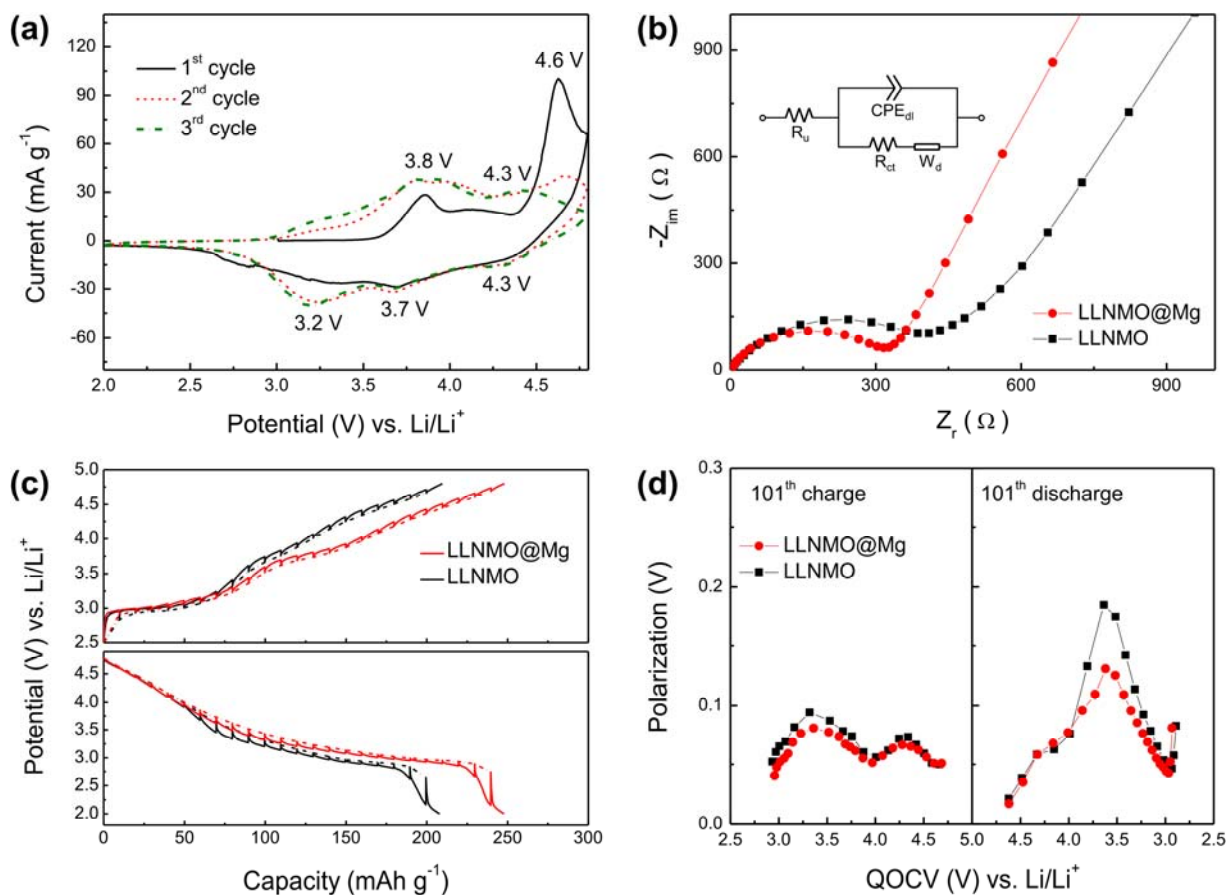

**Fig. S4** (a) CVs of the LLNMO@Mg MSs between 4.8 and 2.0 V at a scan rate of  $0.05 \text{ mV s}^{-1}$ . (b) Nyquist plots of the LLNMO@Mg and LLNMO MSs measured at an open-circuit voltage of 2.0 V after the first cycle. Inset shows the equivalent circuit fitted with uncompensated resistance ( $R_u$ ), charge transfer resistance ( $R_{ct}$ ), double layer capacitance ( $CPE_{dl}$ ), and Warburg impedance ( $W_d$ ). (c) GITT curves of the LLNMO@Mg and LLNMO electrodes by 30 min charging/discharging and 1 h relaxation after the 100<sup>th</sup> cycle. (d) Polarization curves in the transient potential regions of the LLNMO@Mg and LLNMO MSs electrodes.

Fig. S4a shows the CV curves for the LLNMO@Mg MSs measured at a scan rate of 0.05 mV s<sup>-1</sup> between 4.8 and 2.0 V, whose CV profiles are analogous to previously reported Li-rich cathode materials.<sup>[S1,S2]</sup> In the anodic sweep, two anodic peaks at 3.8 and 4.6 V were observed. The well-defined anodic peak at 3.8 V can be assigned to the Ni<sup>2+</sup> oxidation to Ni<sup>4+</sup>, while the peak at 4.3 V could be ascribed to the oxidation of Mn<sup>3+</sup> to Mn<sup>4+</sup>. The other sharp anodic peak at 4.6 V could be related to the Li<sub>2</sub>MnO<sub>3</sub> activation. In the following cathodic sweep, the reduction peak at 3.7 V could be attributed to the Ni<sup>4+</sup> reduction, while the peak at 3.2 V could be assigned to the Mn<sup>4+</sup> reduction to Mn<sup>3+</sup>.<sup>[S1,S2]</sup> Hence, the reversible redox reaction of the LLNMO@Mg MSs involved both Ni and Mn elements. The changes in the cycling profiles from the second cycle onward were quite smooth, indicating good cycling reversibility of the LLNMO@Mg MSs.

In order to understand the reasons for the enhanced performances of the LLNMO@Mg MSs, potential polarization curves were obtained from the GITT measurements after the 100<sup>th</sup> cycle, as shown in Fig. S4c. The polarization curves were plotted by the difference between the closed-circuit and quasi-open-circuit potential in the transient potential profiles.<sup>[S3]</sup> The LLNMO@Mg MSs electrode shows a smaller polarization in Fig. S4d, which means that the LLNMO@Mg MSs could have enhanced charge transfer rates, compared with bare LLNMO MSs.<sup>[S4]</sup> Therefore, the Li<sup>+</sup> diffusivity of the LLNMO@Mg MSs could be definitely higher than that of the bare LLNMO MSs electrodes.

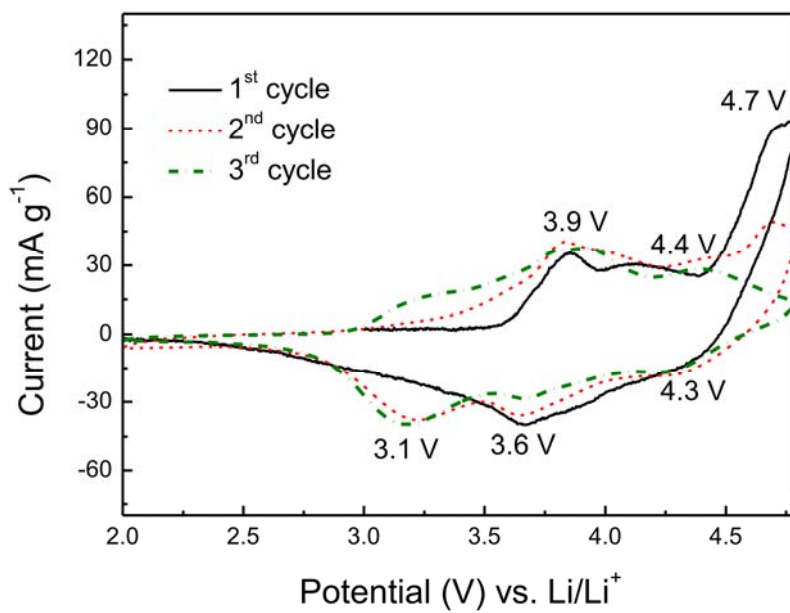

**Fig. S5** CVs of the LLNMO MSs electrode from 4.8 to 2.0 V at a scan speed of 0.05 mV s<sup>-1</sup>.

As shown in Fig. S5, the bare LLNMO MSs electrode showed large potential polarization compared with the LLNMO@Mg MSs, indicating that the LLNMO@Mg MSs could have improved kinetic properties.



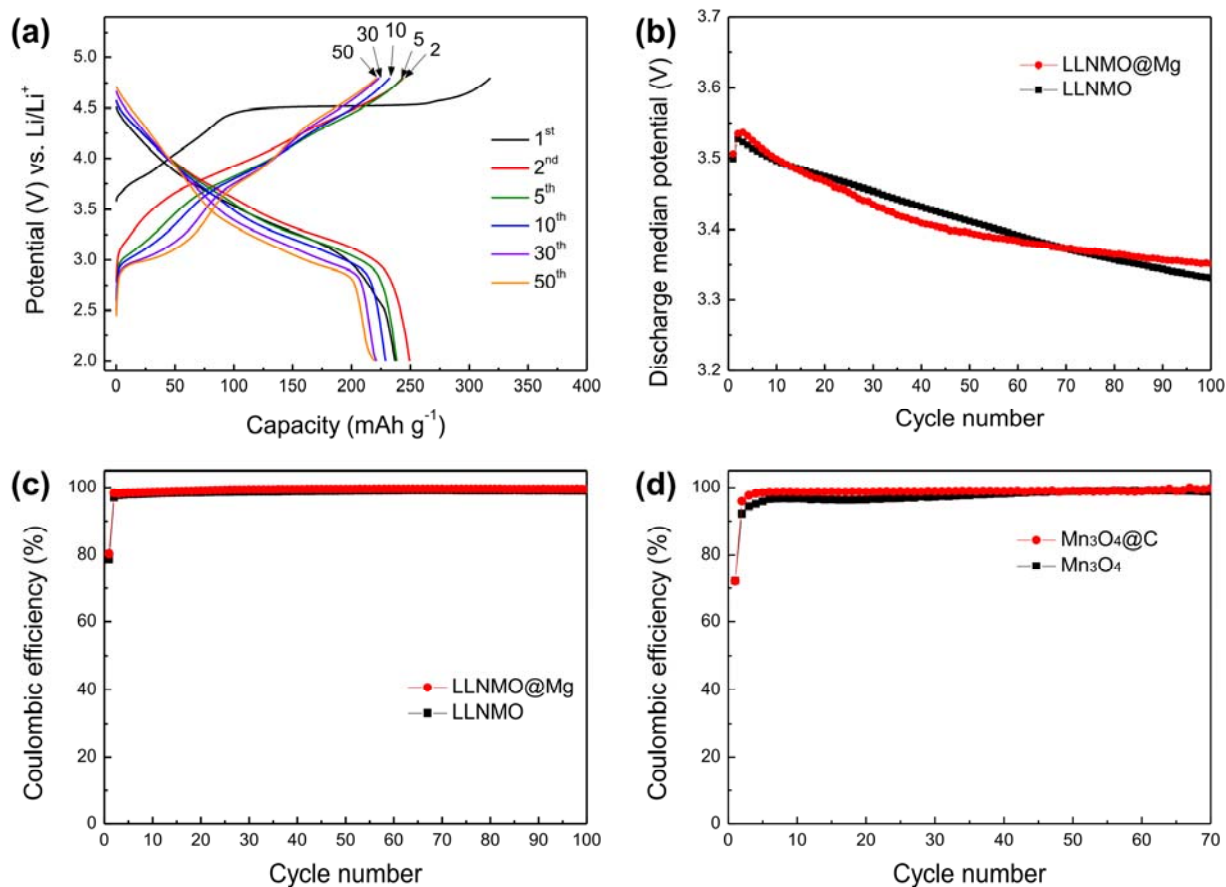

**Fig. S6** (a) Potential profiles of the bare LLNMO MSs. (b) Discharge median potential profiles of the LLNMO@Mg and LLNMO MSs electrodes. Coulombic efficiency-cycle number curves of (c) LLNMO@Mg and (d) Mn<sub>3</sub>O<sub>4</sub>@C electrodes.

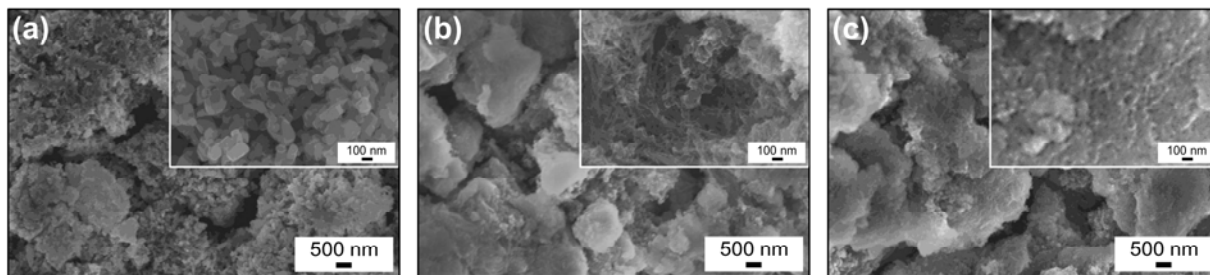

**Fig. S7** (a-c) SEM images of (a) LLNMO@Mg, (b)  $\text{Mn}_3\text{O}_4$ @C, and (c)  $\text{Mn}_3\text{O}_4$  MSs electrodes in the half-cell after cyclings.

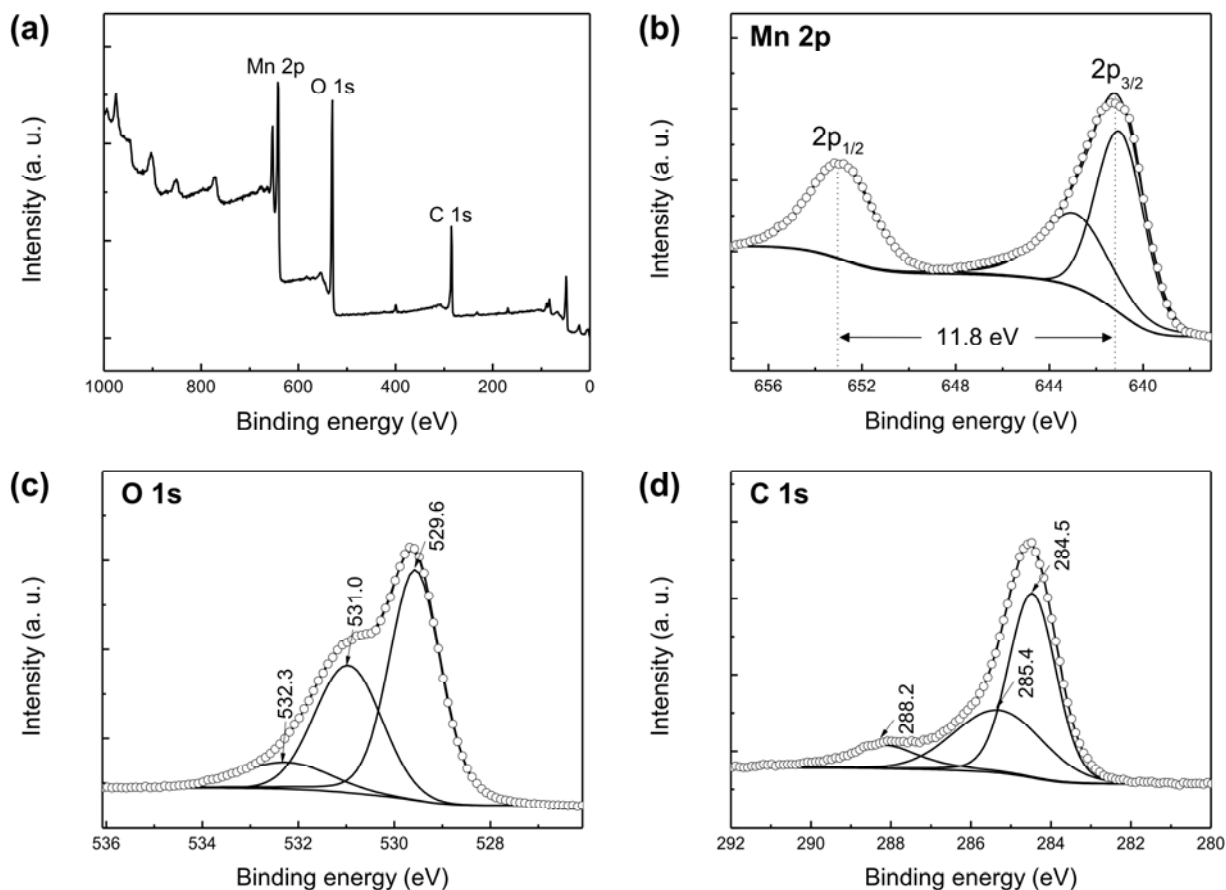

**Fig. S8** (a-d) XPS spectra of (a) full scan, (b) Mn 2p, (c) O 1s, (d) C 1s regions of the Mn<sub>3</sub>O<sub>4</sub>@C MSs.

XPS analysis was performed to examine the oxidation state of Mn, O, and C elements in the Mn<sub>3</sub>O<sub>4</sub>@C MSs. The XPS survey spectra of the Mn<sub>3</sub>O<sub>4</sub>@C MSs are depicted in Fig. S8a. In Fig. S8b, the peaks at 653.1 and 641.3 eV can be attributed to Mn 2p<sub>1/2</sub> and Mn 2p<sub>3/2</sub>, respectively. The binding energy difference is 11.8 eV, which is in line with previous reports.<sup>[S5,S6]</sup> As shown in Fig. S8c, the O 1s photoelectron peak is deconvoluted into three peaks: the main peak at 529.6

eV is ascribed to the oxygen species in the  $\text{Mn}_3\text{O}_4$  MSs, while minor peaks at 531.0 and 532.3 eV correspond to the  $\text{OH}^-$  species or chemisorbed oxygen.<sup>[S5]</sup> As shown in Fig. S8d, the C 1s spectrum peaks can be resolved into three peaks: one peak at 284.5 eV is attributed to C–C, whereas the other peaks at 285.4 and 288.2 eV can be assigned to C–O, and C=O, respectively.<sup>[S6]</sup> Consequently, the XPS spectra further demonstrate that the  $\text{Mn}_3\text{O}_4@\text{C}$  MSs are composed of the  $\text{Mn}_3\text{O}_4$  and carbon layers.

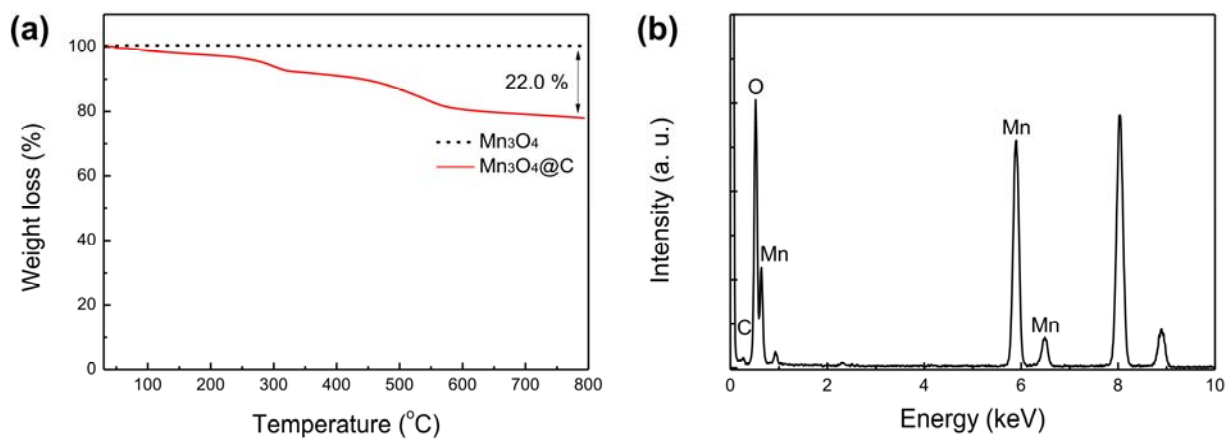

**Fig. S9** (a) TGA curves of the Mn<sub>3</sub>O<sub>4</sub>@C and Mn<sub>3</sub>O<sub>4</sub> MSs. (b) EDX spectrum of the Mn<sub>3</sub>O<sub>4</sub>@C MSs.

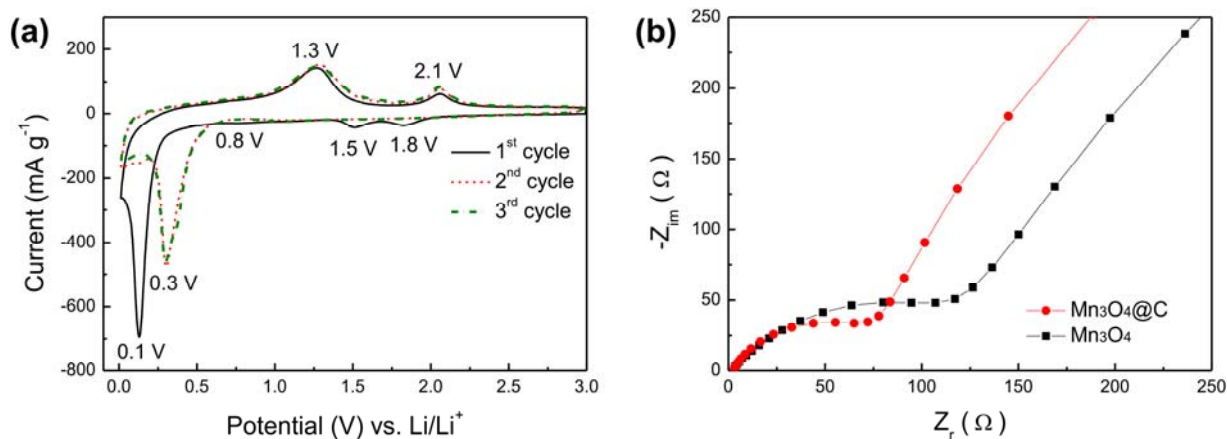

**Fig. S10** (a) CV profiles of  $\text{Mn}_3\text{O}_4@\text{C}$  MSs at a scan rate of  $0.05 \text{ mV s}^{-1}$ . (b) Nyquist plots of the  $\text{Mn}_3\text{O}_4@\text{C}$  and  $\text{Mn}_3\text{O}_4$  MSs measured at an open-circuit voltage of  $3.0 \text{ V}$  after the first cycle.

Fig. S10a presents the CV profiles for the  $\text{Mn}_3\text{O}_4@\text{C}$  MSs electrode obtained from  $3.0$  to  $0.01 \text{ V}$  at a scan rate of  $0.05 \text{ mV s}^{-1}$ , whose curves are analogous to previously reported  $\text{Mn}_3\text{O}_4$ -based materials.<sup>[S7,S8]</sup> In the first cycle, there are weak reduction peaks at  $1.8$  and  $1.5 \text{ V}$ , which are assigned to the compound formation of  $\text{Li}$  in  $\text{Mn}_3\text{O}_4$  and reduction of  $\text{Mn}_3\text{O}_4$  to  $\text{MnO}$ , respectively.<sup>[S7]</sup> The intense peak at  $0.1 \text{ V}$  is related to the  $\text{MnO}$  reduction to  $\text{Mn}^0$ . The broad peak at  $0.8 \text{ V}$  is attributed to the SEI layer formation. In the first oxidation process, the peaks at  $1.3$  and  $2.1 \text{ V}$  are observed, which are in accordance with the oxidation of metallic  $\text{Mn}^0$  to  $\text{MnO}$  and oxidation of  $\text{MnO}$  to  $\text{Mn}_3\text{O}_4$ , respectively.<sup>[S7,S8]</sup> The CV profiles in the subsequent two cycles almost overlap, implying enhanced cyclability of the  $\text{Mn}_3\text{O}_4@\text{C}$  MSs electrode.

To further understand the enhanced electrode kinetics of the  $\text{Mn}_3\text{O}_4@\text{C}$  MSs as compared with the  $\text{Mn}_3\text{O}_4$  MSs, the resistance was investigated with EIS measurements. A semicircle at a high-to-medium frequency and a sloping line at a low frequency were observed in the Nyquist

plots, as shown in Fig. S10b. From the Nyquist plots, the charge transfer resistance ( $R_{ct}$ ) of the  $Mn_3O_4@C$  MSs electrode (72.1  $\Omega$ ) is much smaller than that of the  $Mn_3O_4$  electrode (107.1  $\Omega$ ), indicating the improved electrical conductivity and  $Li^+$  transfer rate by the carbon coating to the  $Mn_3O_4$  MSs.<sup>[S3]</sup> Therefore, the  $Mn_3O_4@C$  MSs showed enhanced electrochemical properties compared to the bare  $Mn_3O_4$  MSs electrode.

## **References**

- (S1) L. Li, L. Wang, X. Zhang, Q. Xue, L. Wei, F. Wu and R. Chen, *ACS Appl. Mater. Interfaces*, 2017, **9**, 1516-1523.
- (S2) D. Chen, Q. Yu, X. Xiang, M. Chen, Z. Chen, S. Song, L. Xiong, Y. Liao, L. Xing and W. Li, *Electrochim. Acta*, 2015, **154**, 83-93.
- (S3) J. G. Kim, Y. Noh and Y. Kim, *J. Ind. Eng. Chem.*, 2022, **107**, 280-290.
- (S4) Y. J. Nam, D. Y. Oh, S. H. Jung and Y. S. Jung, *J. Power Sources*, 2018, **375**, 93-101.
- (S5) W. Mao, W. Yue, Z. Xu, J. Wang, J. Zhang, D. Li, B. Zhang, S. Yang, K. Dai, G. Liu and G. Ai, *ACS Appl. Mater. Interfaces*, 2020, **12**, 39282-39292.
- (S6) S.-C. Weng, S. Brahma, P.-C. Huang, Y.-C. Huang, Y.-H. Lee, C.-C. Chang and J.-L. Huang, *Appl. Surf. Sci.*, 2020, **505**, 144629.
- (S7) Y. Qin, Z. Jiang, L. Guo, J. Huang and Z.-J. Jiang, *Chem. Eng. J.*, 2021, **406**, 126894.
- (S8) D. Zhang, G. Li, J. Fan, B. Li and L. Li, *Chem. Eur. J.*, 2018, **24**, 9632-9638.
